# Supplementary material
Source: PubMed Central journal article supplement (PMC4282142)
Supplement: NIHMS651148-supplement-Corrections.pdf [file NIHMS651148-supplement-Corrections.pdf]

**Nguyen TT, Le G, Nguyen T, et al. Breast cancer screening among Vietnamese Americans: a randomized controlled trial of lay health worker outreach. Am J Prev Med 2009;37(4):306–13.**

There was an error in the conclusions of the abstract; the correct version is printed here. The publisher and editors regret the error and any inconvenience it may have caused our readers.

Conclusions: Lay health workers increased breast cancer screening among Vietnamese-American women. Future research should focus on how LHWs work and whether LHW outreach can be disseminated to other ethnic groups.

In addition, in the Results section, under Mammography outcomes, there is an error near the end of the paragraph. The corrected text reads: The intervention effect size was significantly greater than the comparison effect size (17.4% vs 1.6%,  $p < 0.001$ ).

This same error occurs in Table 3, under “Had a mammogram in the past 2 years (all participants).” The cell in the third column to the right of that header (Change) should read 1.6% instead of 2.4%; the cell in the sixth column to the right of that header (Change) should read 17.4% instead of 16.2%; and the cell in the final column (Change) should read 15.8% instead of 14.2%.

The authors and the production team regret these errors and any inconvenience they may have caused.
